# Supplementary material for: Hematopoietic stem cells retain functional potential and molecular identity in hibernation cultures
Source: PubMed Central journal article supplement (PMC8190576; doi:10.1016/j.stemcr.2021.04.002), 2021-05-06

**Supplemental Information**

**Hematopoietic stem cells retain functional potential and molecular identity in hibernation cultures**

**Caroline A. Oedekoven, Miriam Belmonte, Daniel Bode, Fiona K. Hamey, Mairi S. Shepherd, James Lok Chi Che, Grace Boyd, Craig McDonald, Serena Belluschi, Evangelia Diamanti, Hugo P. Bastos, Katherine S. Bridge, Berthold Göttgens, Elisa Laurenti, and David G. Kent**

## 1 **Supplementary Data Items**

2

### 3 **Mice**

4 C57BL/6-Ly5.2 (WT) were purchased from Charles River Laboratory (Saffron Walden, Essex,  
5 UK). C57BL/6w41/w41-Ly5.1 (W41) were bred and maintained at the University of  
6 Cambridge. *NOD.Cg-Prkdc<sup>scid</sup>Il2rg<sup>tm1Wjl</sup>/SzJ* (NSG) mice were obtained from Charles River or  
7 bred in-house. Mice were maintained in the Central Biomedical Service (CBS) animal facility  
8 of Cambridge University and housed in specific pathogen-free environment, according to  
9 institutional guidelines. All the procedures performed were in compliance with the guidance  
10 on the operation of ASPA (Animals Scientific Procedures Act 1986), following ethical review  
11 by the University of Cambridge Animal Welfare and Ethical Review Body (AWERB).

12

### 13 **Isolation of mouse Sca1<sup>high</sup> ESLAM HSCs and *in vitro* assays**

14 Bone marrow cells were isolated from spine, sternum, femora, tibiae and pelvic bones of both  
15 hind legs of WT mice. Bones were crushed in 2% Fetal Calf Serum (FCS, STEMCELL or Sigma  
16 Aldrich (Sigma)) and 1mM EDTA (Sigma) in PBS (Sigma). Red cell lysis was performed by  
17 treatment with Ammonium Chloride (NH<sub>4</sub>Cl, STEMCELL). Depletion of mature lineage cells  
18 was performed using EasySep mouse hematopoietic progenitor cell enrichment kit  
19 (STEMCELL). HSCs were isolated from the lineage depleted cell suspension by using  
20 fluorescence-activated cell sorting (FACS) using EPCR<sup>high</sup>, CD45<sup>+</sup>, Sca-1<sup>high</sup>, CD48<sup>low/neg</sup>, CD150<sup>+</sup>  
21 (or “ESLAM”), as described previously (Kent *et al.*, 2009), using CD45 FITC (Clone 30-F1,1 BD  
22 Biosciences, San Jose CA, USA (BD)), EPCR PE (Clone RMEPCR1560, STEMCELL), CD150 Pacific  
23 Blue (PB) or PE-Cy7 (Clone TC15-12F12.2, both from Biolegend, San Diego, USA (Biolegend)),  
24 CD48 APC (Clone HM48-1, Biolegend), Sca-1 Brilliant Violet (BV) 421 (Clone D7, Biolegend)  
25 and 7-Aminoactinomycin D (7AAD) (Life Technologies, Carlsbad, CA, USA (Life Technologies)).  
26 The cells were sorted in either purity or single sort mode on an Influx cell sorter (BD  
27 Biosciences, San Jose, CA, USA (BD)) using the following filter sets 488 530/40 (for FITC), 561  
28 585/29 (for PE), 405 460/50 (for BV421), 640 670/30 (for APC), 561 750LP (for PE/Cy7), 640  
29 750LP (for APC/Cy7), 405 520/35 (for BV510), 640 720/40 (for AF700), and 561 670/30 (for 7-  
30 AAD) or 405 450/50 (for DAPI). When single HSCs were required, the single-cell deposition  
31 unit of the sorter was used to place 1 cell into each well of a round bottom 96-well plate, each

32 well having been preloaded with 50uL medium which would be topped up with 50uL medium  
33 with 2X cytokines.

34

#### 35 **Normalisation of single cell index-sorting data**

36 Surface marker intensity of single ESLAM HSCs across experiments were normalised and batch  
37 corrected by using the flowCore (version 1.42.3) and sva (version 3.24.4) R packages. HSCs  
38 were sorted in 96-well format and each plate was considered as an independent batch prior  
39 to batch correction. All recorded surface markers were arranged in a flow frame and subject  
40 to logicle transformation prior to batch correction. The analysis was computed in R (version  
41 3.4.2) and performed by Daniel Bode. The original script was developed by Blanca Pijuan Sala.

42

#### 43 **Liquid cultures and clone size determination of mouse HSCs**

44 Single HSCs were sorted and cultured into 100µL StemSpan SFEM (STEMCELL) supplemented  
45 with 300 ng/mL SCF (R&D Systems, Bio-Techne, Minneapolis, MI, USA, (R&D)), 20ng/mL  
46 human Interleukin-11 (IL-11, R&D), 2 mM L-Glutamine (Sigma), 1000 U/mL-100 µg/mL  
47 Penicillin-Streptomycin (Sigma), 100µM 2-Mercaptoethanol (Life Technologies). SCF  
48 concentration was 300ng/mL unless stated otherwise. 10% of FCS was supplemented when  
49 stated. For serum-free cultures, cells were sorted into Ham's F12 nutrient mixture (Gibco,  
50 ThermoFisher, Waltham, MA, USA (Gibco)) supplemented with 20 ng/mL human IL-11 (R&D),  
51 300 ng/mL SCF (SCT or R&D), 2 mM L-Glutamine (Sigma), 1000U/mL-100 µg/mL Penicillin-  
52 Streptomycin (Sigma), 1% ITS-X (Insulin-Transferrin Selenium-Ethanolamine, Gibco), 100 mM  
53 HEPES (4-(2-hydroxyethyl)-1 piperazineethanesulfonic acid, Sigma), 100 mg/mL human serum  
54 albumin (HSA, Albumin Bioscience, Huntsville, AL, USA).

55 Cells were cultured at 37°C, 5% CO<sub>2</sub>, 20% O<sub>2</sub>. Cell counts were performed every 22-24 hours  
56 and cell cycle kinetics determined for the first and second division by visual inspection, scoring  
57 wells as having 1, 2, or 3-4 cells. Clone size at day 10 post-isolation was scored as very small  
58 (less than 50 cells), small (50-500 cells), medium (500-10,000 cells), or large (10,000 or more  
59 cells).

60

#### 61 **Time lapse of single mouse HSCs**

62 Single cells were sorted into a 96 well plate and imaged on a Leica DMI3000 B microscope,  
63 housed inside an Okolab CO2 microscope cage incubator system. Custom written LabVIEW  
64 software was used to control a Prior Proscan III nanopositioning stage and acquire images via  
65 a Hamamatsu Orca Flash 4.0 camera. Cells were imaged every 50 minutes for the first 7 days,  
66 the fastest time resolution achievable with the system while allowing enough time for the  
67 autofocus routine to correctly execute at all 96 wells. On day 7, the plate was removed and  
68 300ng/mL SCF was added to the 67 wells where there was a possibility of a viable cell,  
69 determined by eye. The reduction in well number allowed for an increase in time resolution  
70 to 35 minutes. By day 11, imaged well number was further reduced to 17 wells as it became  
71 more apparent in which wells cells were still viable. This allowed for a corresponding increase  
72 in time resolution to 20 minutes. Imaging continued until day 14.

73

#### 74 **Colony-forming assays of mouse HSCs**

75 Single cultured cells (hibernated HSCs) were transferred from liquid culture into 600  $\mu$ l of  
76 MethoCult GF M3434 (STEMCELL). Freshly isolated HSCs were isolated by FACS sorting (as  
77 described above) and plated into 3 mL Methocult GF M3434 (STEMCELL) and split across 2  
78 wells of 6-well plates. Cells were cultured for 14 days and colony number was assessed by  
79 visual inspection and colony type scored by antibody staining with CD41 FITC (Clone  
80 MWRReg30), CD61 PE (Clone 2C9.G2 (HM $\beta$ 3-1), Ter119 PE-Cy7 (Clone TER-119), CD45.2 APC-  
81 Cy7 (Clone 104), Ly6G/Gr1 BV421 (Clone 1A8), CD11b/Mac1 APC (Clone M1/70). Samples  
82 were acquired on LSR Fortessa (BD) and flow cytometry data analysing by using FlowJo  
83 (Treestar, Ashland, OR, USA).

84

#### 85 **Bone Marrow Transplantation Assay and Peripheral Blood Analysis**

86 Donor cells were obtained from C56BL/6J mice (CD45.2). Recipient mice were  
87 C57Bl6W41/W41 (W41) mice as described previously (Kent *et al.*, 2009; Benz *et al.*, 2012).

88 Recipient mice were sub-lethally irradiated with a single dose (400cGy) of Cesium irradiation  
89 and all transplants were performed by intravenous tail vein injection using a 29.5G insulin  
90 syringe. Single HSCs were deposited by FACS into 100 $\mu$ L of medium in a 96-well U-bottom  
91 plate. All liquid was subsequently mixed with extra 100 $\mu$ L of PBS and aspirated into the insulin  
92 syringe (avoiding air bubbles) and injected into the tail vein. For secondary transplantations,  
93 whole bone marrow was obtained from primary recipient by flushing tibiae and femurs with

94 PBS + 2%FCS. Red cell lysis was performed and an equivalent of one femur ( $\sim 2 \times 10^7$  cells) of  
95 each donor mouse was transplanted into at least two secondary recipients.

96

97 PB samples were collected in EDTA coated microvette tubes (Sarstedt AGF & Co, Nuembrecht,  
98 Germany). Blood was collected from the tail vein at week 8, 12, 16, 20, 24, post-  
99 transplantation, unless otherwise stated. Red cell lysis was performed by using  $\text{NH}_4\text{Cl}$  and  
100 samples were subsequently analysed for repopulation levels as previously described (Kent et  
101 al. 2016; Wilson et al. 2015). Cells were stained for lineage markers using Ly6g BV421 (Clone  
102 1A8), B220 APC (Clone RA3-6B2), CD3e PE (Clone 17A2), CD11b/Mac1 PE-Cy7 or BV605 (Clone  
103 M1/70), CD45.1 AF700 (Clone A20), CD45.2 FITC (Clone 104). All antibodies were obtained  
104 from Biolegend. Samples were acquired on LSR Fortessa (BD) and flow cytometry data  
105 analysing by using FlowJo (Treestar, Ashland, OR, USA).

106

#### 107 **Single cell RNA sequencing analysis**

108 Single cell RNA sequencing (scRNA seq) analysis was performed as described previously in  
109 Picelli et al. 2014 (Smart-seq2). Single ESLAM HSCs were sorted by FACS into 96-well PCR  
110 plates containing lysis buffer (0.2% Triton X-100 (Sigma), RNase inhibitor (SUPERase,  
111 ThermoFisher), nuclease-free water (Thermo Fisher)) Illumina Nextera XT DNA preparation kit  
112 was used to prepare the libraries, which were pooled and run on the Illumina Hi-Seq4000 at  
113 the CRUK Cambridge Institute Genomics Core. Cells from which low-quality libraries with  
114 insufficient sequencing depths were generated were excluded by setting the threshold of  
115 number of mapped reads to  $> 2 \times 10^5$ , with mapped reads comprising nuclear genes,  
116 mitochondrial genes and ERCCs. A minimum threshold of 20% for reads mapping to known  
117 genes was set, in order to exclude empty wells and dead cells. In addition, the threshold for  
118 reads mapping to mitochondrial genes was  $> 0.2$ , to ensure a minimum of 20% of reads to map  
119 to non-mitochondrial genes. Protein-coding genes were extracted for further processing. GEO  
120 accession number: GSE160131.

121

#### 122 **Lentiviral transduction of mouse HSCs**

123 7000 ESLAM HSCs cells were isolated and split between 4 wells (1750 cells/well) of a 96-well  
124 plate (Corning). Following their isolation, cells were kept in 50  $\mu\text{L}$  of medium (StemSpan,  
125 10%FCS, 20ng/mL IL-11) and were supplemented with polybrene (Sigma) and pHIV-ZsGreen

126 CSTVR lentivirus supplied by Dr Alasdair Russell from Cancer Research UK (CRUK). Plates were  
127 centrifuged at 600g for 30 minutes, at 30°C, to promote infection, before being transferred  
128 into a 37°C incubator. Two days after, cells were collected from the wells and resorted for  
129 viability (7AAD-). Live cells (4001) were transplanted into 6 sub-lethally irradiated CD45.1 W41  
130 recipient mice (for an approximate dose of 615 cells/mouse) and monitored for donor  
131 chimerism as described above, and GFP expression.

132

### 133 **Isolation of human CB HSCs and *in vitro* assays**

134 Cord blood samples were obtained from Cambridge Blood and Stem Cell Biobank (CBSB) with  
135 informed consent from healthy donors in accordance with regulated procedures approved by  
136 the relevant Research and Ethics Committees. Mononuclear cells (MNCs) were isolated using  
137 Lymphoprep (Axis Shield PLC, Dundee, UK) or Pancoll lymphocyte separating medium  
138 (Pancoll, PAN Biotech, Aidenbach, Germany). Blood was mixed with equal volume of PBS and  
139 layered on Lymphoprep/Pancoll. Layered blood was centrifuged at 1400 rpm for 25 min, at  
140 room temperature with the brake off. The MNC layer was carefully aspirated and washed with  
141 PBS, to remove any separating medium trace. Red cell lysis was subsequently performed by  
142 using red cell lysis buffer (Biolegend, San Diego, CA, USA (Biolegend)). MNCs were depleted  
143 of differentiated hematopoietic cells by using the human CD34 microbead kit (Miltenyi Biotec,  
144 Bergisch Gladbach, Germany) with the following modifications: all cells were resuspended in  
145 90  $\mu\text{L}$  PBS, 2% FCS /  $10^8$  cells, CD34 Microbeads were used at  
146 30  $\mu\text{L}/10^8$  cells and FcR Blocking Reagents at 30  $\mu\text{L}/10^8$  cells. Cells were separated using  
147 the AutoMACS cell separation technology (Miltenyi Biotec).

148 CD34 enriched cells were stained with CD34 APC-Cy7 (Clone HIT2, Biolegend), CD38 PE-Cy7  
149 (Clone HIT2, Biolegend), CD45RA FITC or PE (Clone HI100, Biolegend), CD90 APC or PE (Clone  
150 5E10, Biolegend or Biosciences respectively), CD49f PE-Cy5 (Clone GoH3, Biosciences) and  
151 Zombie Aqua (Biolegend) was used as a cell viability marker. HSCs were sorted as CD34<sup>+</sup>,  
152 CD38<sup>-</sup>, CD45RA<sup>-</sup>, CD19<sup>-</sup>, CD49f<sup>+</sup>, CD90<sup>+</sup> on a BD FACS Aria fusion sorter at the NIHR Cambridge  
153 BRC Cell Phenotyping Hub facility. The single cells were sorted into individual wells of a 96-  
154 well U-bottom plate, each well having been preloaded with 100 $\mu\text{L}$  medium.

155

### 156 **Liquid cultures and clone size determination of human LT-HSCs**

157 Single HSCs were sorted into 96-well U-bottom plates and cultured in 100µL StemSpan SFEM  
158 (STEMCELL) supplemented with 100 units/mL Penicillin and 100µg/mL Streptomycin  
159 (Pen/Strep, Sigma-Aldrich), 2mM L-Glutamine (Sigma-Aldrich), 10<sup>-4</sup>M 2-Mercaptoethanol and  
160 20 ng/mL IL-11 (Biotechne, Abingdon, UK (Bio-techne)), 300ng/mL stem Cell Factor (SCF,  
161 R&D)(added when specified), 10% FCS (added when specified). Cell survival was assessed by  
162 visual inspection on day 10 (the sorting day is determined as day 0).

163

#### 164 **Xenotransplantation and Peripheral Blood Analysis**

165 10,862 LT-HSCs were isolated from CD34 enriched CB and cultured into a single well (U-  
166 bottom 96-well plate) for 7 days as described above for the single cell culture. On day 7, cell  
167 number was assessed by visual inspection and cells were serially diluted in PBS as following:  
168 ~110 cells split into 5 recipients (~22 cell per mouse), ~440 cells split into 4 recipients (~110  
169 cells per mouse), ~654 cells split into 3 recipients (~218 cells per mouse). NSG mice were sub-  
170 lethally irradiated with a single dose (2.4 Gy) by Cesium irradiation. Twenty-four hours later  
171 mice were anesthetised with isoflurane and injected intrafemorally as previously described  
172 <sup>29</sup>.

173 PB samples were collected in EDTA coated microvette tubes (Sarstedt AGF & Co, Nuembrecht,  
174 Germany). Blood (~100µL) was collected from the tail vein at 8, 12, and 20 weeks post-  
175 transplantation. Mice were sacrificed 20 weeks post-transplantation and BM cells were  
176 isolated by flushing the injected femur with PBS/FCS. Blood was transferred into polystyrene  
177 tubes (Becton Dickinson) tubes and diluted 1:1 with 2%FCS in PBS. 1 mL of Lymphoprep  
178 (STEMCELL) was carefully layered at the bottom of the tube and the tubes were centrifuge  
179 for 25 min at 500g (brake off). MNCs were collected, washed with PBS and resuspended in  
180 50µL of PBS/FCS and transferred into a 96 u-bottom plate (Falcon) to stain. Cells were stained  
181 with the following lineage markers: CD19/FITC (clone HIB19, Biolegend), GlyA/PE (clone HIR2,  
182 BD), CD45/PE-Cy5 (clone HI30, Biolegend), CD14/PE-Cy7 (clone M5E2, Biolegend), CD33/APC  
183 (clone P67.6, BD), CD19/AF700 (clone HIB19, Biolegend) , CD3/APC-Cy7 (clone HIT3a,  
184 Biolegend), CD45/BV510 (clone HI30, Biolegend). Samples were acquired on LSR Fortessa (BD)  
185 and flow cytometry data were analysed by using FlowJo v10 (FLOWJO LLC, Ashland, OR, USA).  
186 To detect human engraftment, two distinct antibodies against CD45 were used, and cells were  
187 considered human if positive for both (CD45<sup>++</sup>). Mice were considered successfully

188 repopulated if the percentage of (CD45<sup>++</sup>)  $\geq$  0.01% (and at least 30 cells were recorded in  
189 these gates).

190

### 191 **Statistical analysis**

192 Computational analyses were performed in the R programming environment (version 3.6.3).

193 Raw data was processed using the Seurat tool (version 3.2.0)(Butler *et al.*, 2018; Stuart *et al.*,

194 2019). The recommended standard processing pipeline was applied to perform log-

195 normalisation (default settings) and identify highly variable genes (nfeatures=10,000).

196 Subsequently, expression values were scaled using default parameters. Dimensionality

197 reduction, including principal component analysis (PCA) and Uniform Manifold

198 Approximation and Projection (UMAP) was performed using default Seurat tools. Differential

199 gene expression was performed using negative binomial generalised linear models, as

200 implemented by DESeq2 (version 1.26.0)(Love, Huber and Anders, 2014). Genes with adjusted

201 *p-value*  $<0.05$  and logFC  $>1.5$  were considered significantly differentially expressed

202 (Benjamini-Hochberg corrected). Cell cycle scoring was performed based on average

203 expression of key cell cycle genes, as described previously(Tirosh *et al.*, 2016). Similarly, gene

204 set scoring was computed for previously described HSC proliferation quiescence signatures

205 (Venezia *et al.*, 2004). Such scoring was also applied to gene sets, previously identified as

206 upregulated and downregulated in cells in a G0 state(Cheung and Rando, 2013). Batch effect

207 testing and correction was performed to inform any potential influence of technical bias.

208 Normalisation and variable gene scoring were computed for each batch separately, using

209 variance stabilising transformation. Subsequently, separate batches were integrated using

210 canonical correlation analysis (CCA) by computing integration anchors (parameters: dims =

211 1:30 and k.filter = 10)(Stuart *et al.*, 2019). A very limited batch correction was identified

212 between Day 1 and Day 2 batches (Supplementary figure 1B). However, full data integration

213 introduced extensive over-correction and downstream analysis was performed without batch

214 correction (data not shown). All data visualisation was computed in R. To inspect downstream

215 IL-11 signalling, the following curated pathways gene sets, as outlined in the gene set

216 enrichment analysis database (Mootha *et al.*, 2003; Subramanian *et al.*, 2005) were retrieved:

217 I) KEGG\_JAK\_STAT\_SIGNALING\_PATHWAY (M17411); II) BIOCARTA\_NFKB\_PATHWAY

218 (M15285); III) HALLMARK\_PI3K\_AKT\_MTOR\_SIGNALING (M5923);

219 KEGG\_MAPK\_SIGNALING\_PATHWAY (M10792). Similarly,



220 KEGG\_REGULATION\_OF\_AUTOPHAGY (M6382) and REACTOME\_CELLULAR\_SENESCENCE  
221 (M27188) were used. All gene sets were subsequently manually curated to exclude ligand and  
222 receptor-associated genes (Supplementary Table 1).

223 To compute gene ontology (GO) and KEGG pathway enrichment, gene symbols were  
224 converted to Entrez gene identifiers, using the mouse genome annotation database  
225 (org.Mm.eg.db, version 3.10.0). GO terms were extracted from the GO annotation database  
226 (GO.db, version 3.10.0). GO term enrichment and KEGG pathways analysis was computed  
227 using the Limma package (version 3.42.2). An adjusted *p-value* < 0.05 cutoff was set to  
228 determine GO term or KEGG pathway enrichment. Genes identified as significantly  
229 differentially expressed between cell types were used conduct pathway enrichment.

230 Gene set enrichment analysis (GSEA) was performed using the UC San Diego-Broad Institute  
231 GSEA software (version 4.0.3) (Mootha *et al.*, 2003; Subramanian *et al.*, 2005). Pre-ranked  
232 gene lists were computed based on differentially expressed genes. GSEA was computed using  
233 multiple databases, including GO biological processes, KEGG pathways and the Reactome  
234 database. Analysis parameter were set as follows: 1000 permutations, weighted enrichment,  
235 minimum 15 and maximum 500 genes annotated to gene set.

236

237 **Supplementary appendix 1: Single-cell time-lapse imaging of single HSCs in hibernation**  
238 **cultures.**

239

240 **Supplementary table 1: JAK/STAT, MAPK, NFKB, PI3K/AKT gene sets**

241 JAK/STAT, MAPK, NFKB, PI3K/AKT gene sets manually curated to exclude ligand- and receptor-  
242 associated genes. See also Supplementary Figure 1.

243

244 **Supplementary Figure 1: Molecular profiling of HSC, hibHSC, HSC+SCF, hibHSC+SCF, related**  
245 **to Figure 5**

246 (A) UMAPs depicting (I) cell type (HSC, blue dots; hibHSC, red dots; HSC+SCF, green dots;  
247 hibHSC+SCF, orange dots); (II) batches (batch 0, orange dots; batch 1, blue dots; batch 2,  
248 green dots; batch 3, pink dots); days batches were sequenced (day 1, purple dots; day 2, blue  
249 dots; day 3, orange dots). (B) MolO gene relative expression in HSC, HSC+SCF, hibHSC,  
250 hibHSC+SCF (C) Left panel, PCA of all cells coloured by computationally assigned cell cycle

251 category, right panel, the 4 cellular states are projected onto the PCA. The PCA was computed  
252 using cell cycle genes exclusively.

253

254 **Supplementary Figure 2: HSC proliferation and quiescence signature genes, related to**  
255 **Figure 5**

256 (A) Violin plots displaying individual proliferation scores by physiological condition (B) Gene  
257 Set Enrichment Analysis of the HSC proliferation signature (Venezia *et al.*, 2004), computed  
258 using DE genes of direct comparison of HSCs and HSC+SCF. (C) Heatmap of previously  
259 identified HSC-specific quiescence signature genes (Venezia *et al.*, 2004), sorted by cell type.  
260 (D, E) Gene sets upregulated in G0 cell populations and gene sets downregulated (anti-G0)  
261 were used to compute G0 and anti-G0 gene signature scores (Cheung and Rando, 2013).  
262 These were projected onto the UMAP depictions (see Figure 5A or Supplementary Figure 1A  
263 for reference).

264

265 **Supplementary Figure 3: Autophagy, senescence, and IL-11RA gene signatures, related to**  
266 **Figure 5**

267 (A) Autophagy gene signature scores projected onto the UMAP landscape and summarised in  
268 form of a violin plot. (B) Senescence gene signature depicted as described in (A). (C) Violin  
269 plot of the IL-11 receptor gene (IL-11RA1) and gene signature scores for core signalling  
270 pathways stimulated by IL-11. Includes: PI3K, NKFB, MAPK and JAK-STAT. (D) Violin plots of  
271 top differentially expressed PI3K pathway genes. (E) Top differentially expressed genes of the  
272 NF- $\kappa$ B pathway.

273

274 **Supplementary Figure 4: Specific gene sets are altered during hibernation and SCF-**  
275 **stimulation, related to Figure 6**

276 (A) Violin plots of normalised gene expression of the 13 upregulated genes in SCF-stimulated  
277 cells (HSC+SCF, hibHSC+SCF). (B) Volcano plot of differentially expressed genes, comparing  
278 HSCs and hibHSC. DE genes are marked in red ( $\log_{2}FC > 1$  and adj *p-value*  $< 0.05$ , Benjamini-  
279 Hochberg corrected). (C) Violin plots of normalised gene expression of genes of interest,  
280 downregulated in hibHSC compared to HSC.

281

282 **Supplementary Figure 5: Genes of interests enriched in hibHSCs, related to Figure 6**

283 UMAPs of selected genes of interests enriched in hibHSC (manually selected from DE gene  
284 set. The large majority of the hibHSCs appear in the upper right portion of the plot (see Figure  
285 5A or Supplementary Figure 1A for reference).

A

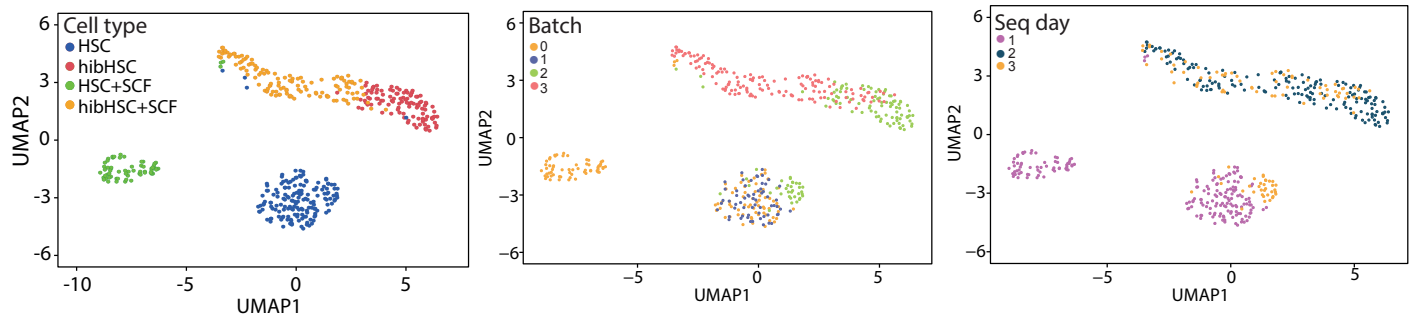

B

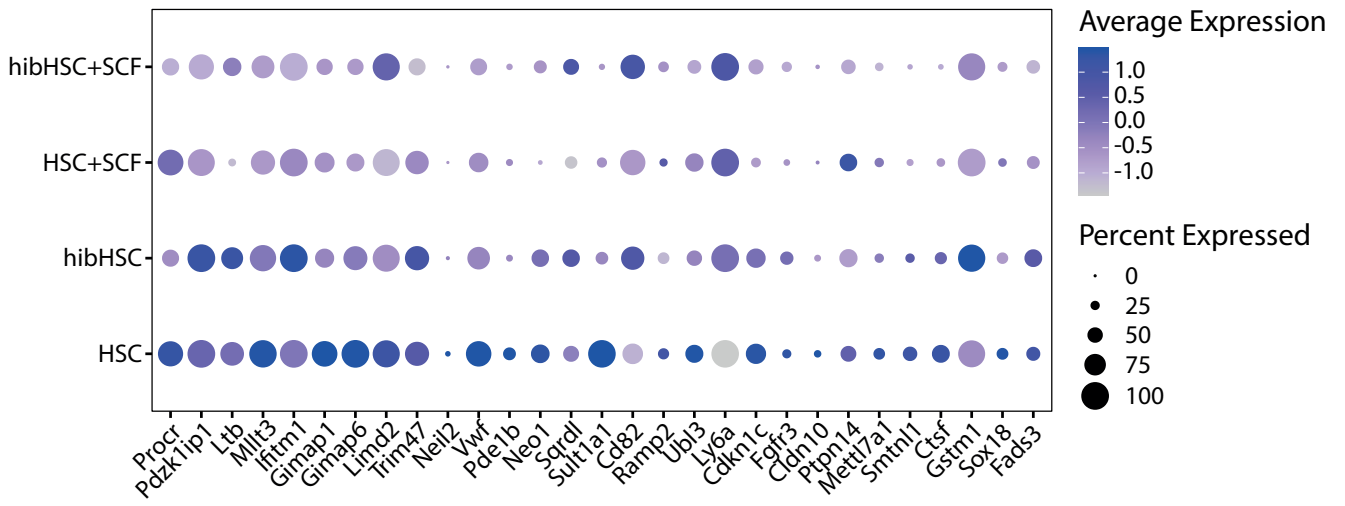

C

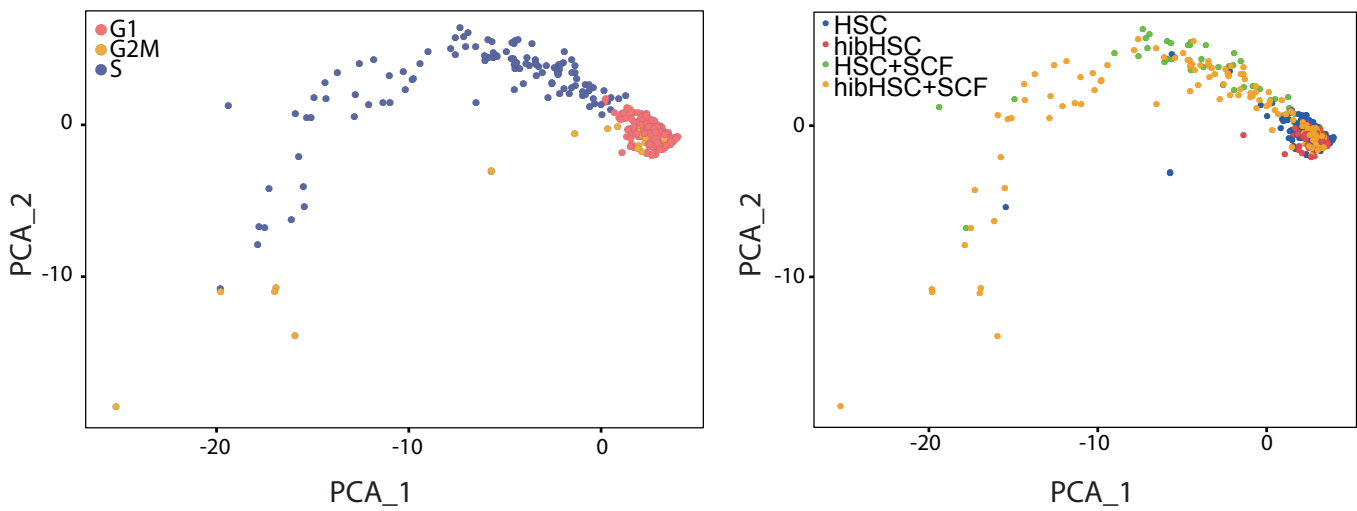

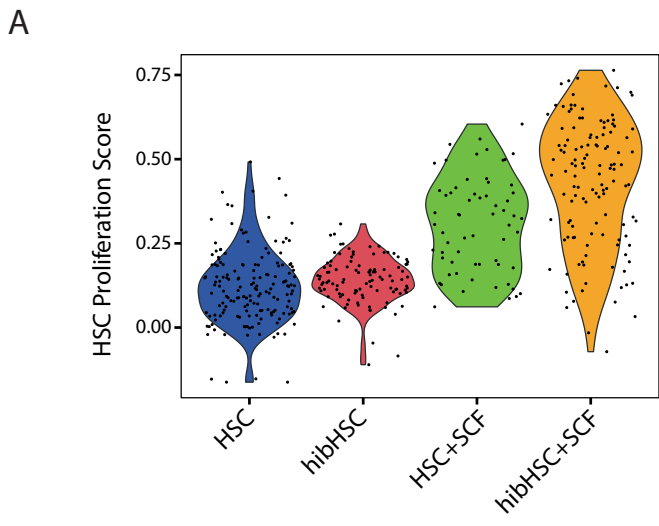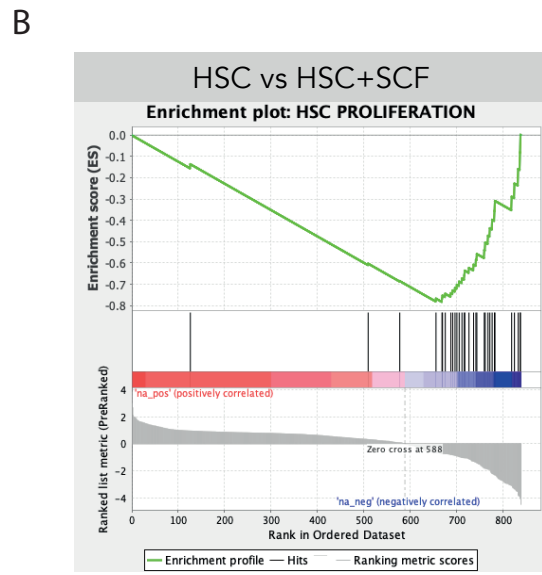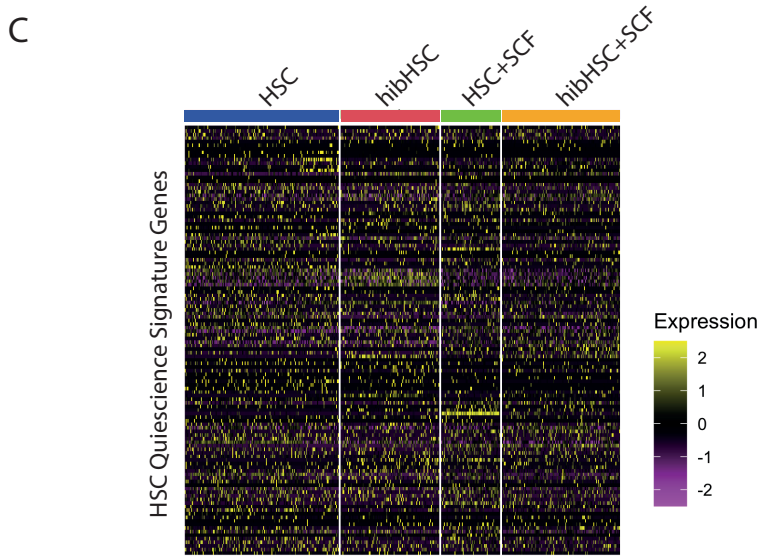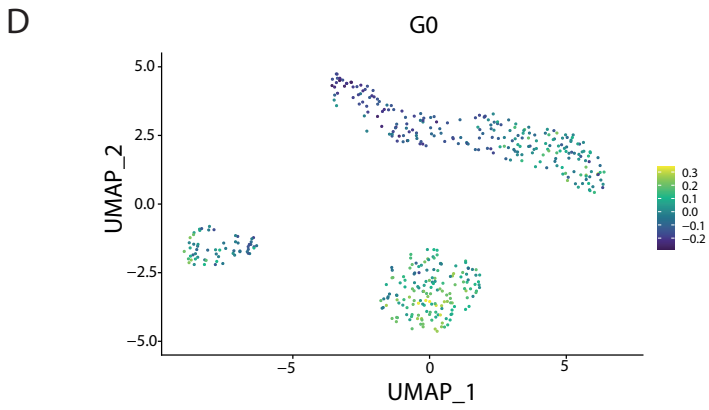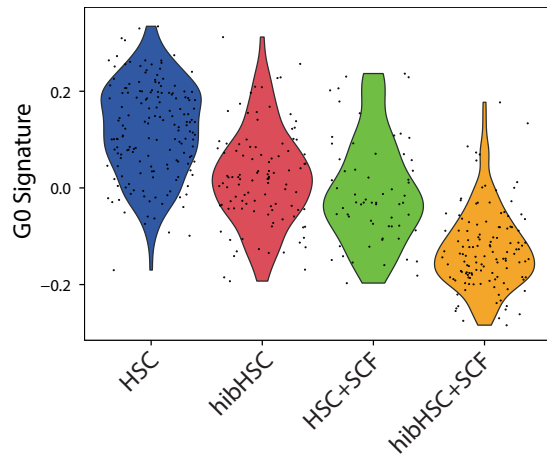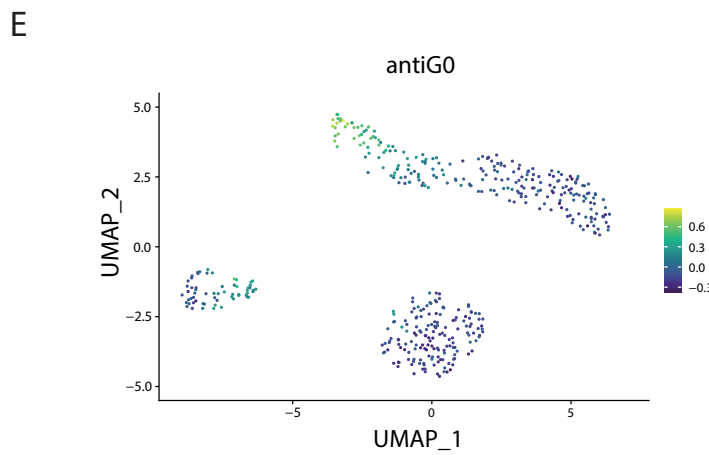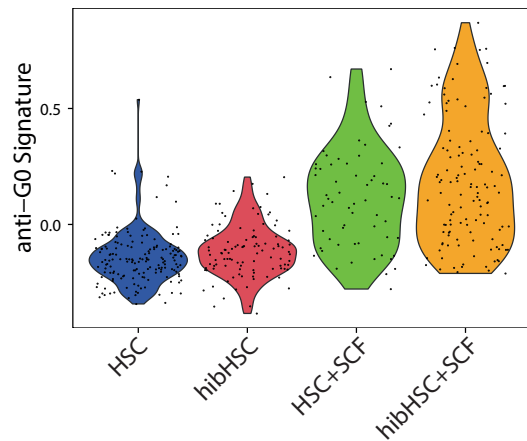

A

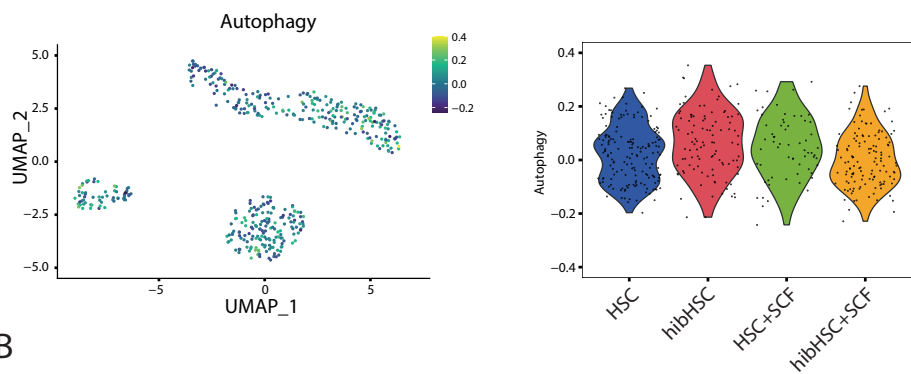

B

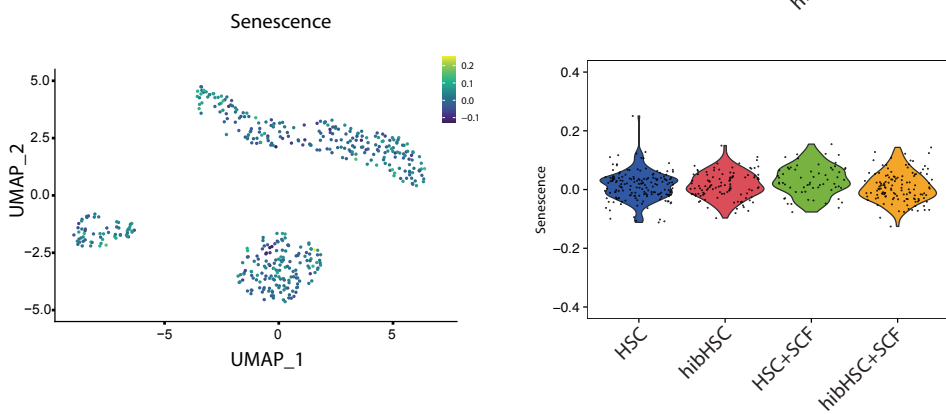

C

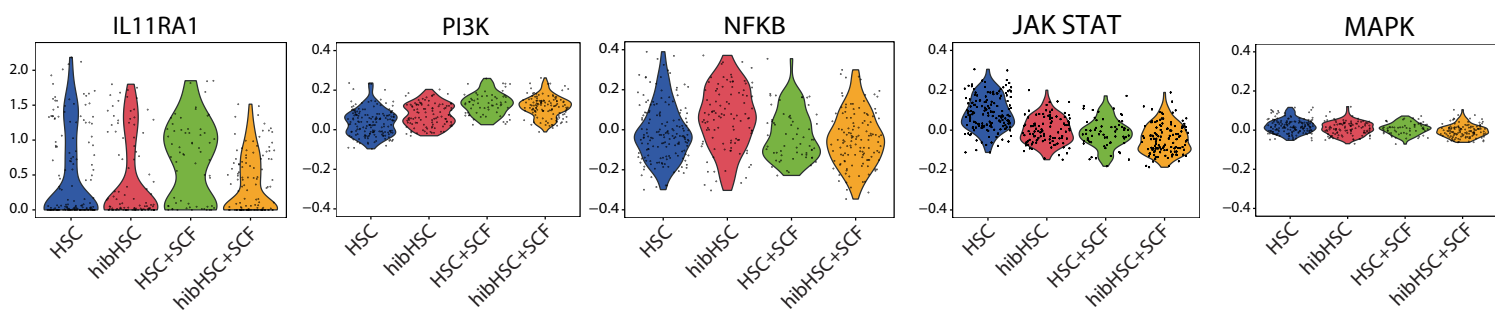

D

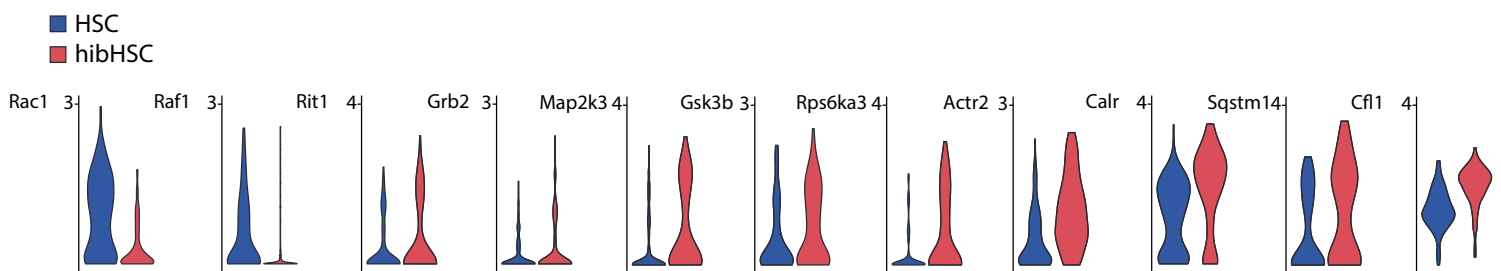

E

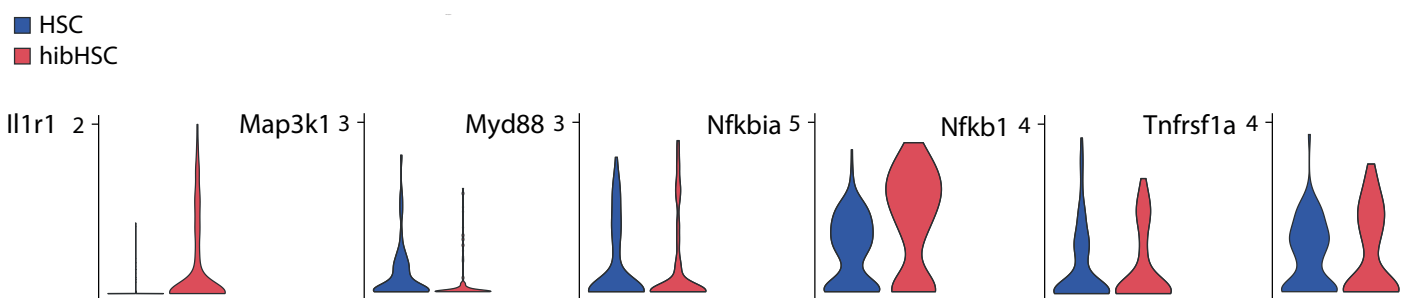

A

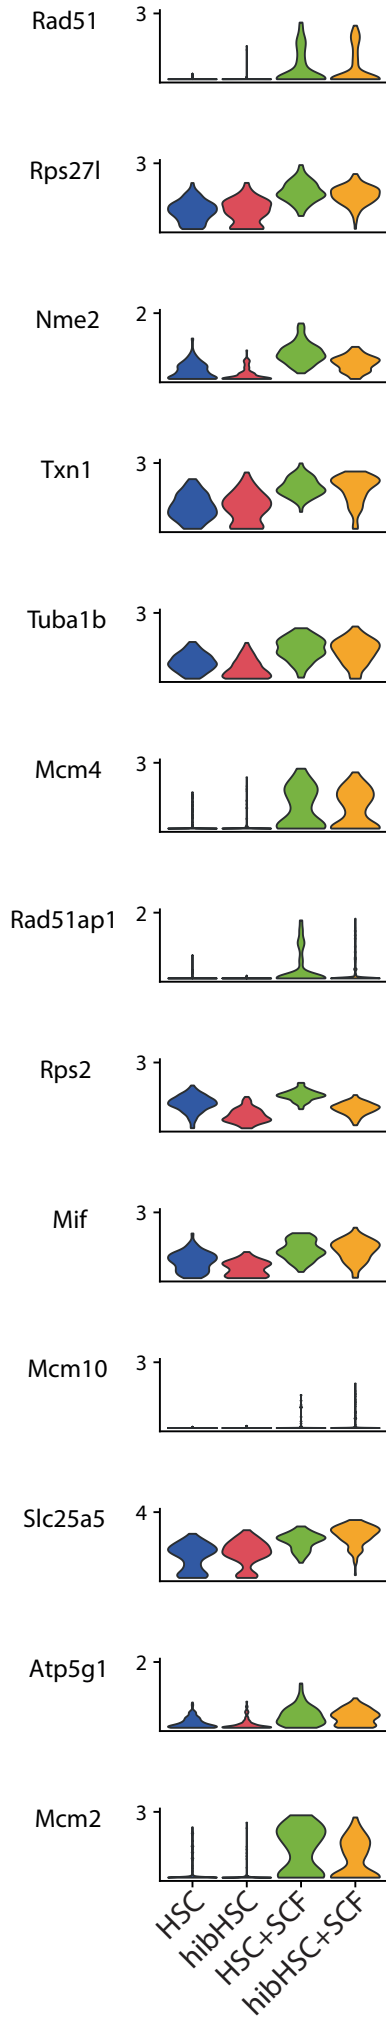

B

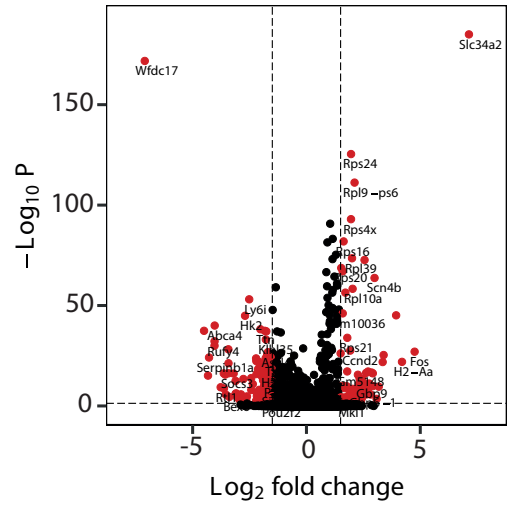

C

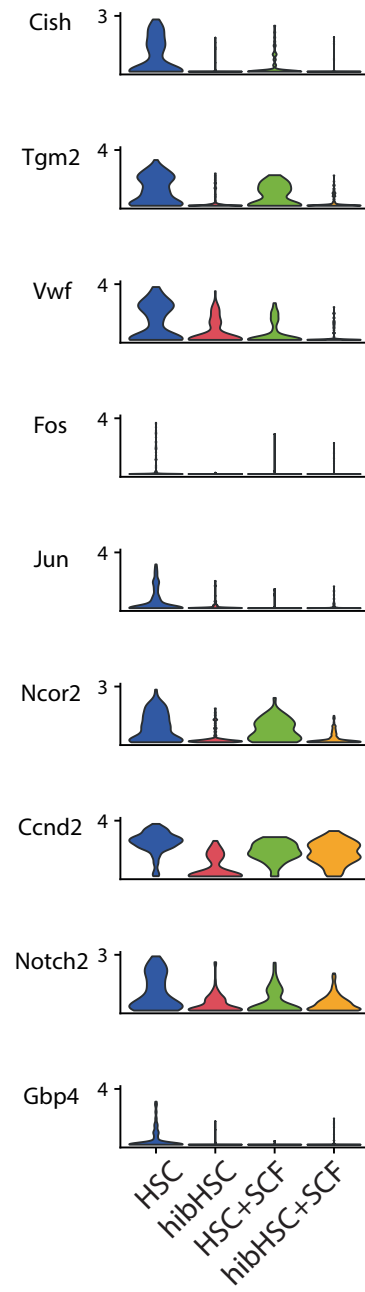

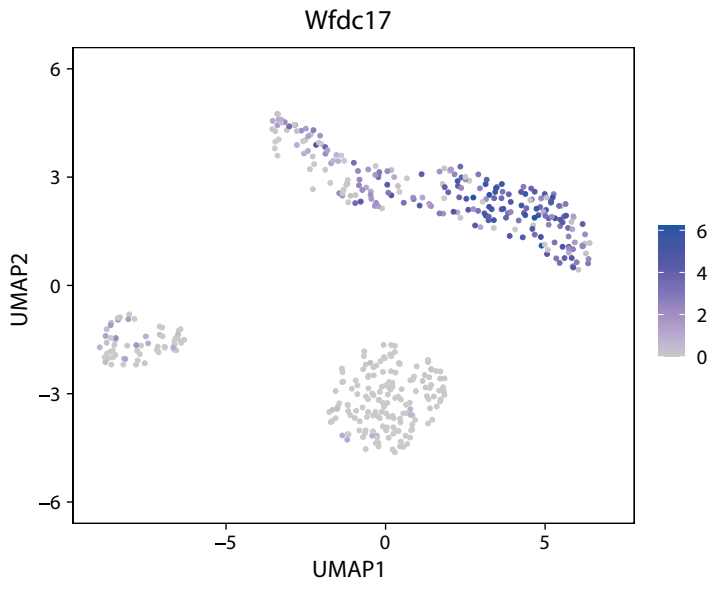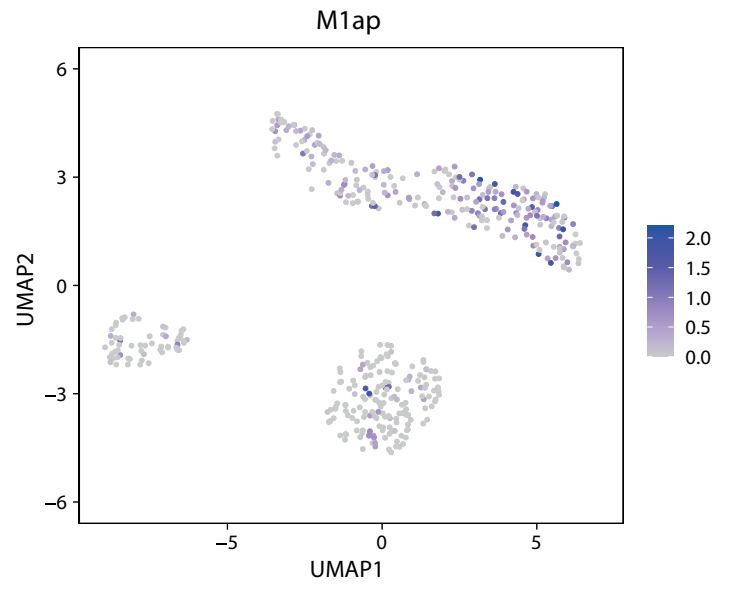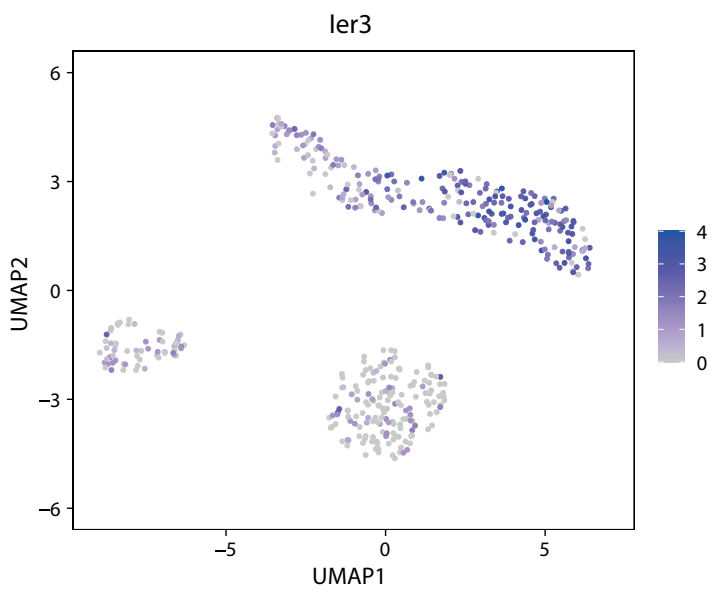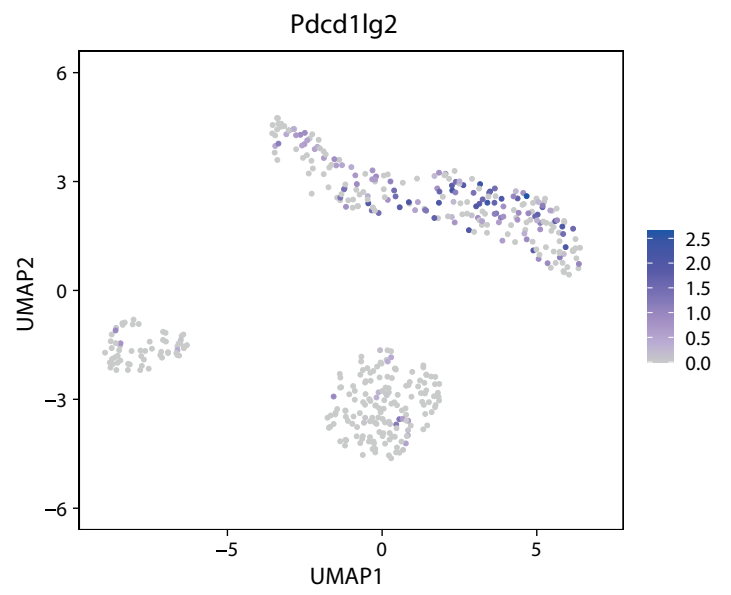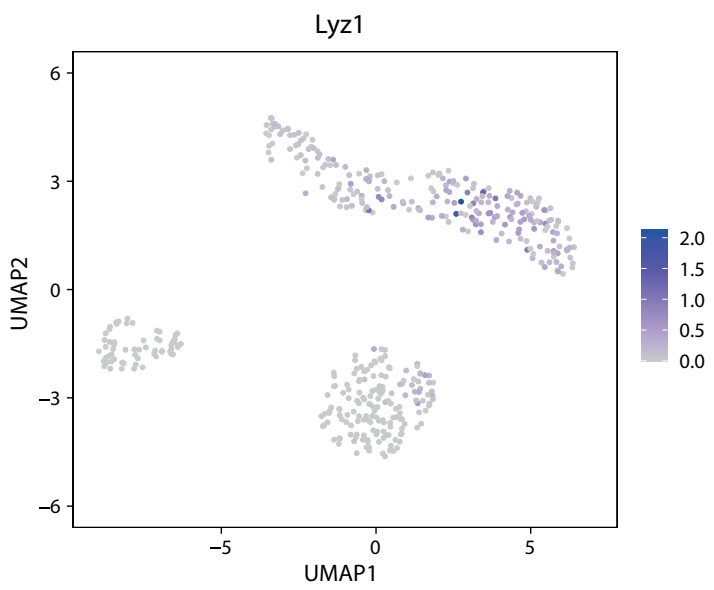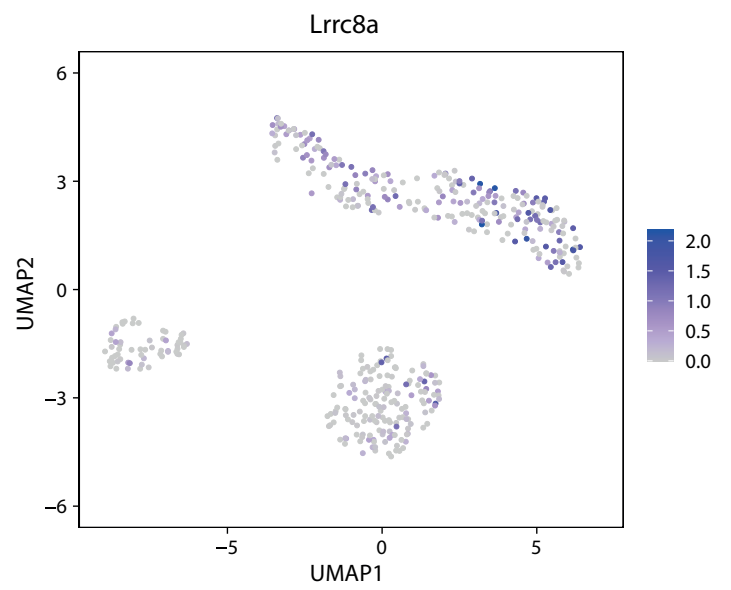

Supplement: mmc1.pdf [file mmc1.pdf]
